# Supplementary material for: Enhancing nanoscale viscoelasticity characterization in bimodal atomic force microscopy
Source: Royal Society of Chemistry journal article supplement (doi:10.1039/d4sm00671b), 2024-01-01
Supplement: d4sm00671b3.pdf [file d4sm00671b3.pdf]

(A)



(B)



(C)



(D)
