# Supplementary figures and images for: Enhancing nanoscale viscoelasticity characterization in bimodal atomic force microscopy
Source: Royal Society of Chemistry journal article supplement (doi:10.1039/d4sm00671b), 2024-01-01

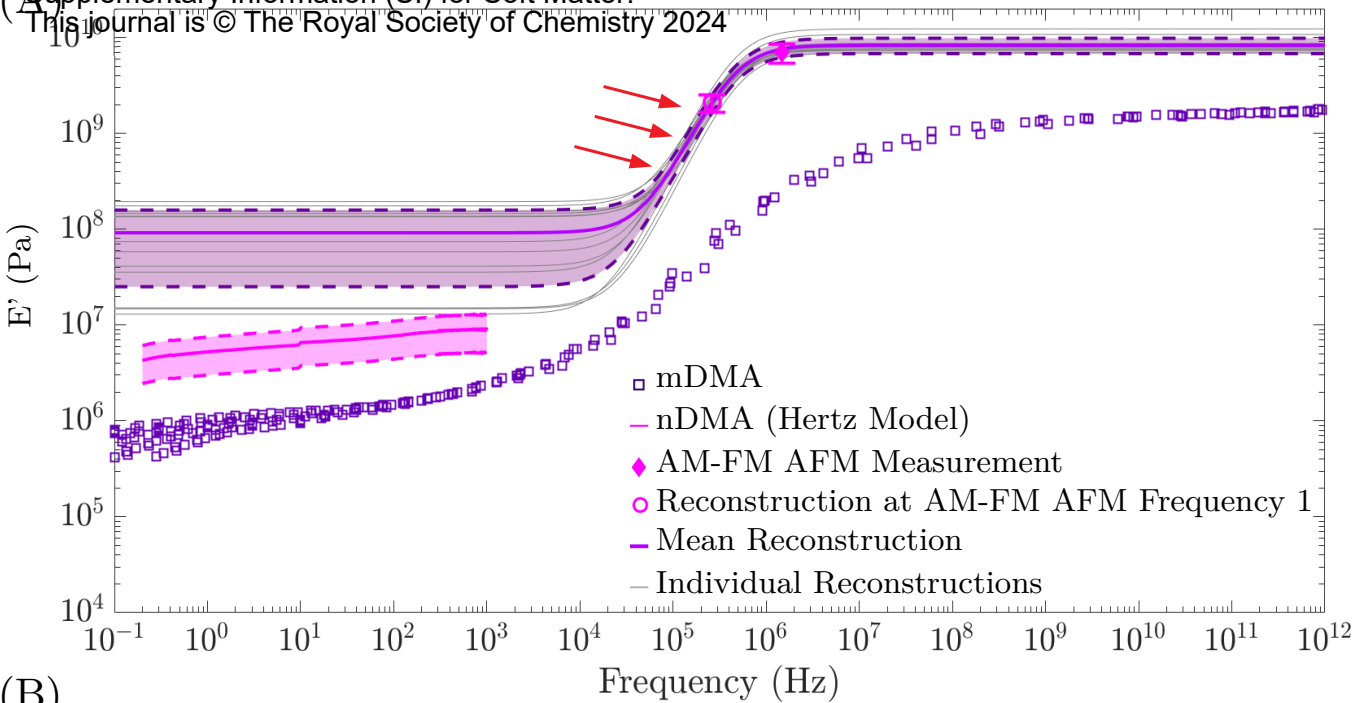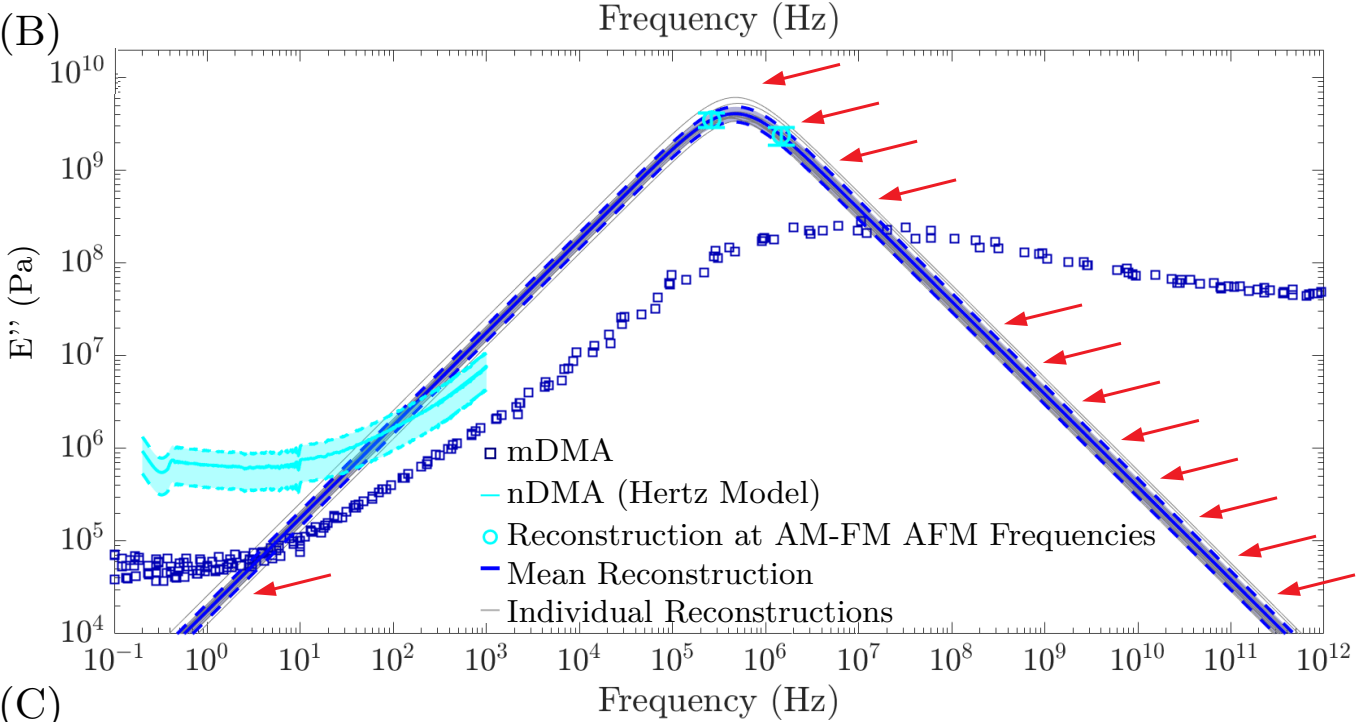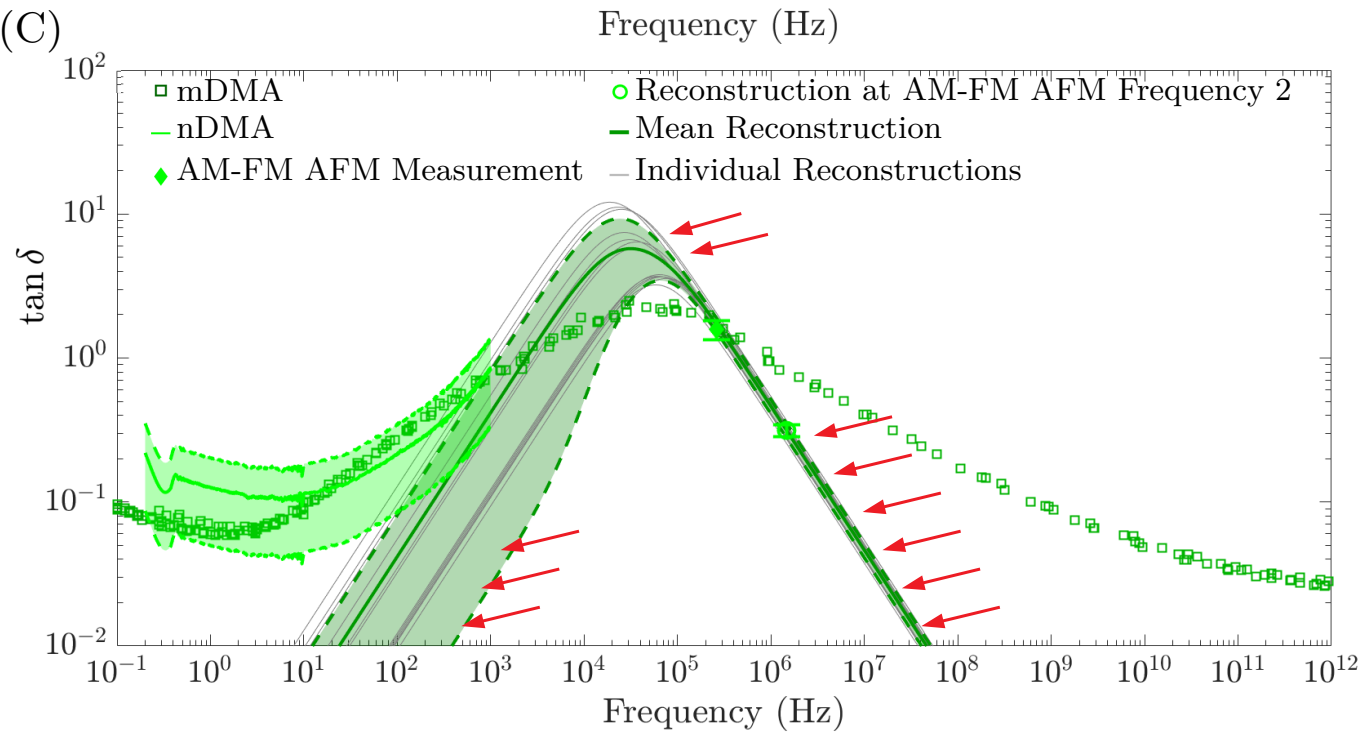

Supplement: d4sm00671b4.pdf [file d4sm00671b4.pdf]
